# Supplementary material for: A combined nanotherapeutic approach targeting farnesoid X receptor, ferroptosis, and fibrosis for nonalcoholic steatohepatitis treatment
Source: PubMed Central journal article supplement — Acta Pharm Sin B. 2024 Feb 26;14(5):2228–46. doi: 10.1016/j.apsb.2024.02.017 (PMC11121165; doi:10.1016/j.apsb.2024.02.017), 2024-02-26
Supplement: mmc1.pdf [file mmc1.pdf]

## Supporting Information for

### ORIGINAL ARTICLE

# **A combined nanotherapeutic approach targeting farnesoid x receptor, ferroptosis, and fibrosis for nonalcoholic steatohepatitis treatment**

**Jiangtao Fu<sup>a,†</sup>, Pingping Zhang<sup>a,†</sup>, Zhiguo Sun<sup>a,†</sup>, Guodong Lu<sup>a,†</sup>, Qi Cao<sup>a</sup>, Yiting Chen<sup>a</sup>, Wenbin Wu<sup>a</sup>, Jiabao Zhang<sup>a,b</sup>, Chunlin Zhuang<sup>a,b</sup>, Chunquan Sheng<sup>a,b</sup>, Jiajun Xu<sup>c\*</sup>, Ying Lu<sup>a,b\*</sup>, Pei Wang<sup>a,b\*</sup>**

<sup>a</sup>*The Center for Basic Research and Innovation of Medicine and Pharmacy (MOE), School of Pharmacy, Naval Medical University, Shanghai 200433, China*

<sup>b</sup>*National Demonstration Center for Experimental Pharmaceutical Education, Naval Medical University/Second Military Medical University, Shanghai 200433, China*

<sup>c</sup>*Department of Diving and Hyperbaric Medicine, Naval Special Medical Center, Naval Medical University, Shanghai 200433, China*

Received 21 November 2023; received in revised form 26 December 2023; accepted 30 December 2023

\*Correspondence authors.

E-mail addresses: [pwang@smmu.edu.cn](mailto:pwang@smmu.edu.cn) (Pei Wang), [acuace@163.com](mailto:acuace@163.com) (Ying Lu), [xujiajun920@163.com](mailto:xujiajun920@163.com) (Jia-Jun Xu).

<sup>†</sup>These authors made equal contributions to this work.

**Figure S1**

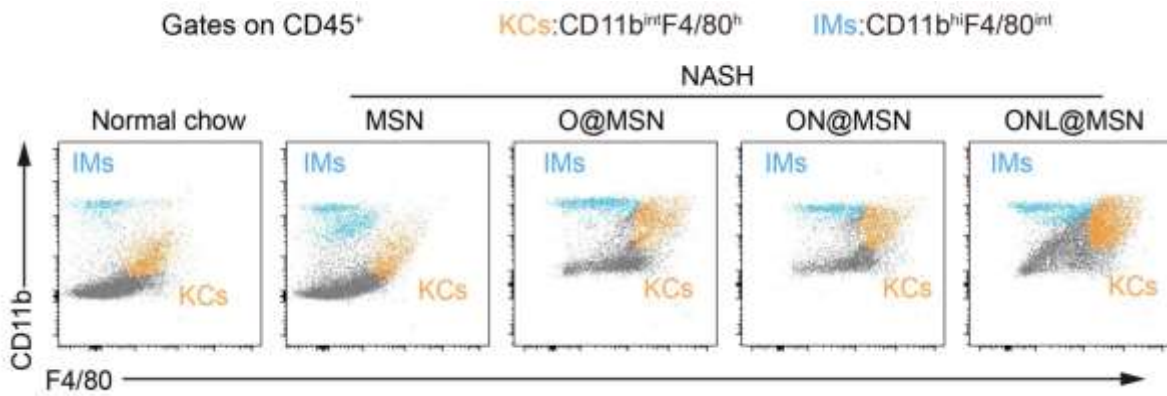

Representative flow cytometry analysis of Kupffer cells (KCs) and infiltrating monocytes (IMs) based on F4/80 and CD11b staining in CD45<sup>+</sup> leukocytes isolated from liver tissues. In the manual gating analysis, the F4/80<sup>high</sup>CD11b<sup>int</sup>CD45<sup>+</sup> cells were considered as KCs, whereas the F4/80<sup>int</sup>CD11b<sup>high</sup>CD45<sup>+</sup> cells were considered as IMs.

**Figure S2**

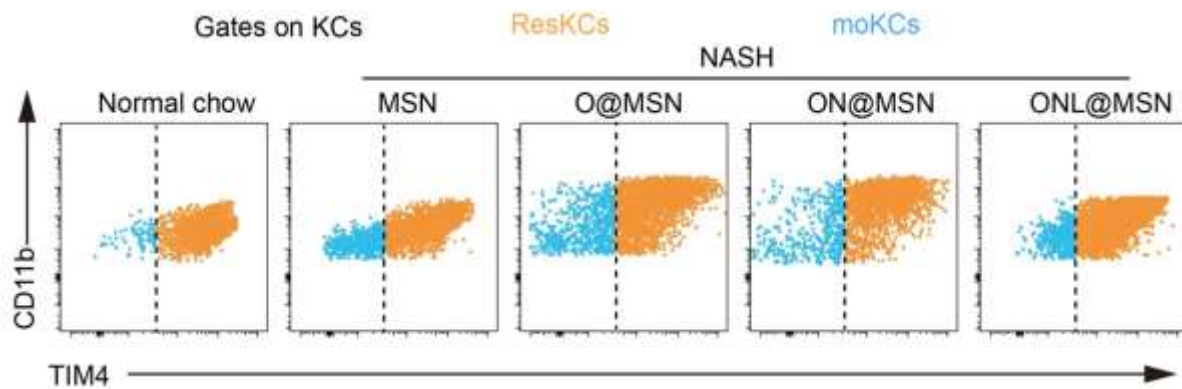

Representative flow cytometry analysis of yolk sac-derived resident KCs (ResKCs) and monocyte-derived KCs (MoKCs) based on TIM4 staining in KCs. In the manual gating analysis, the  $TIM4^{high}F4/80^{high}CD11b^{int}CD45^{+}$  cells were considered as ResKCs, whereas the  $TIM4^{low}F4/80^{high}CD11b^{int}CD45^{+}$  cells were considered as MoKCs. The former resolves inflammation whereas the later induces inflammation.

**Figure S3**

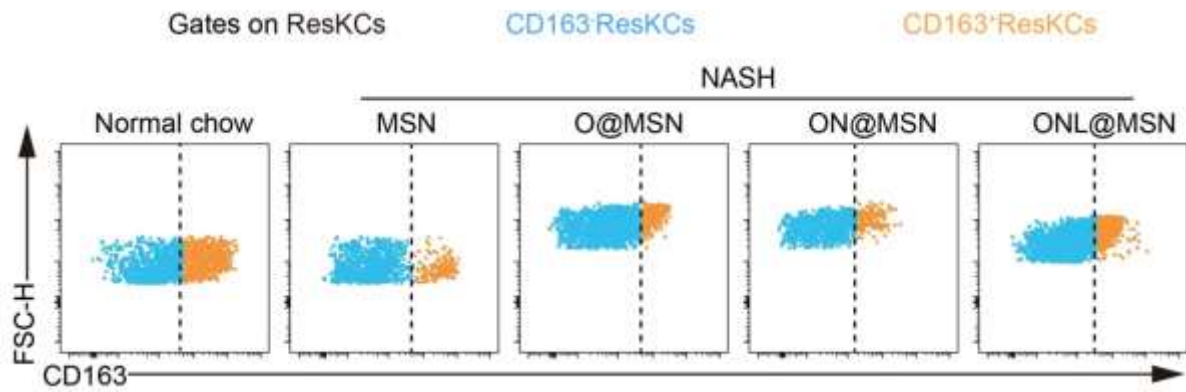

Representative flow cytometry analysis of CD163<sup>+</sup> ResKCs and CD163<sup>-</sup> ResKCs based on CD163 staining in ResKCs. CD163 is a member of the scavenger receptor cysteine-rich family and is expressed by anti-inflammatory M2 macrophages, which produce anti-inflammatory cytokines.

Figure S4

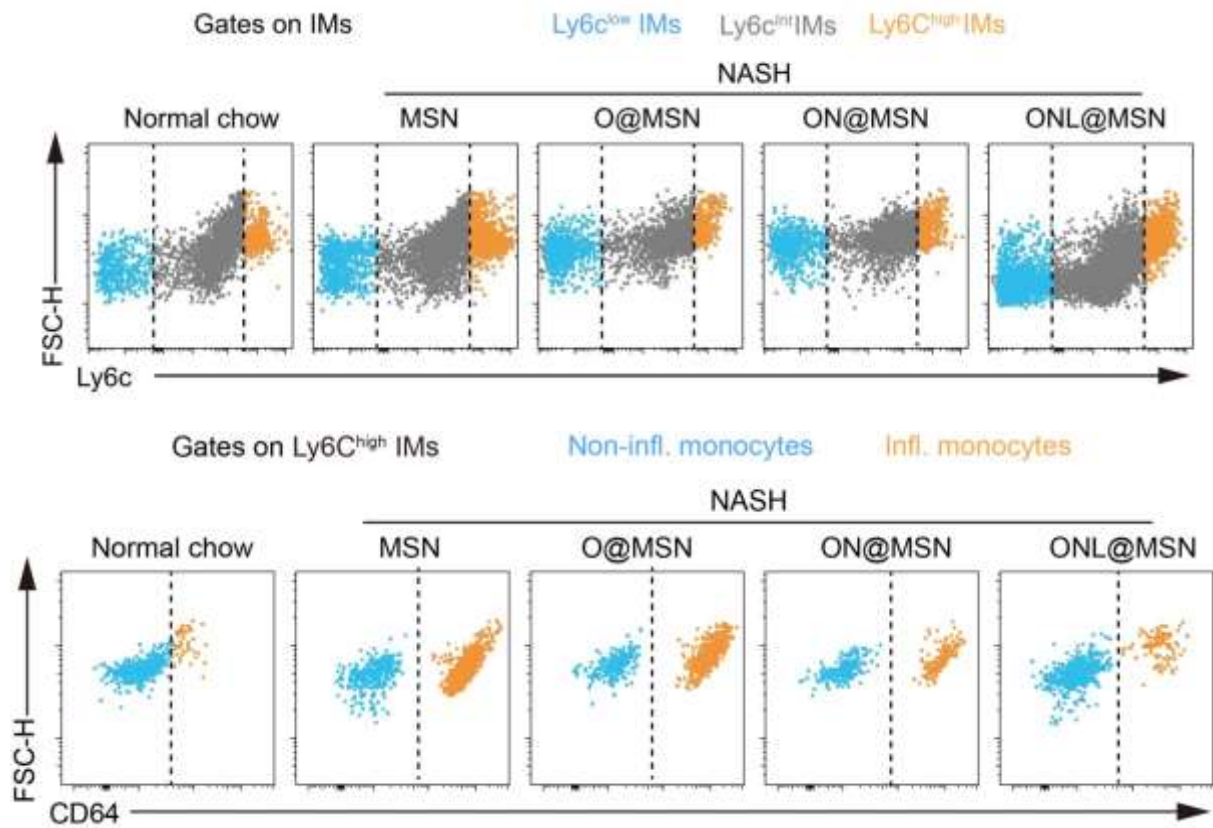

Representative flow cytometry analysis of Ly6C<sup>high</sup> IMs, Ly6C<sup>Int</sup> IMs and Ly6C<sup>low</sup> IMs based on Ly6C staining in IMs (F4/80<sup>int</sup>CD11b<sup>high</sup>CD45<sup>+</sup>), and the further clustering inflammatory monocytes (CD64<sup>+</sup>Ly6C<sup>high</sup> IMs) and non-inflammatory monocytes (CD64<sup>-</sup>Ly6C<sup>high</sup> IMs) based on CD64 staining in Ly6C<sup>high</sup> IMs.

**Figure S5**

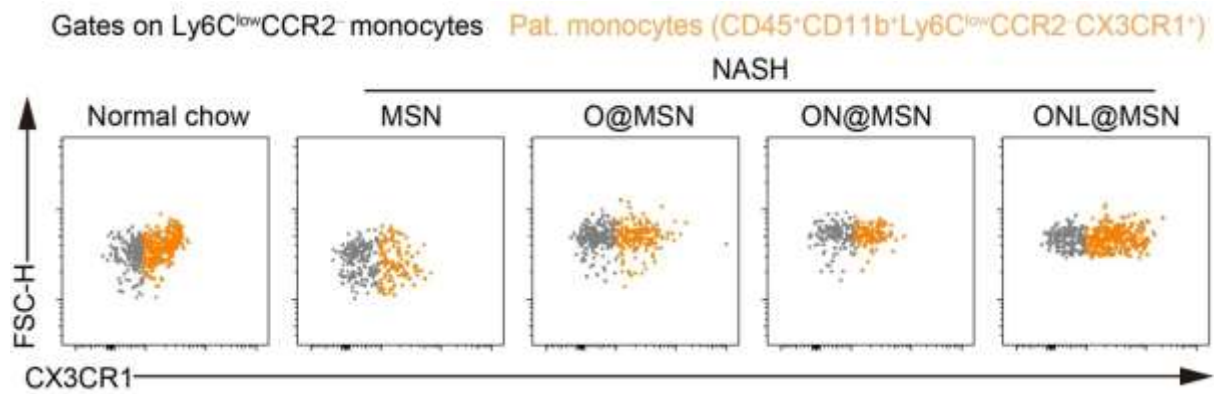

Representative flow cytometry analysis of patrolling monocytes (CD45<sup>+</sup>CD11b<sup>+</sup>Ly6C<sup>low</sup>CCR2<sup>-</sup>CX3CR1<sup>+</sup>) based on CX3CR1 staining in CD45<sup>+</sup>CD11b<sup>+</sup>Ly6C<sup>low</sup>CCR2<sup>-</sup> cells. In the manual gating analysis, the CD45<sup>+</sup>CD11b<sup>+</sup>Ly6C<sup>low</sup>CCR2<sup>-</sup>CX3CR1<sup>+</sup> monocytes are considered to be the patrolling monocytes.

**Figure S6**

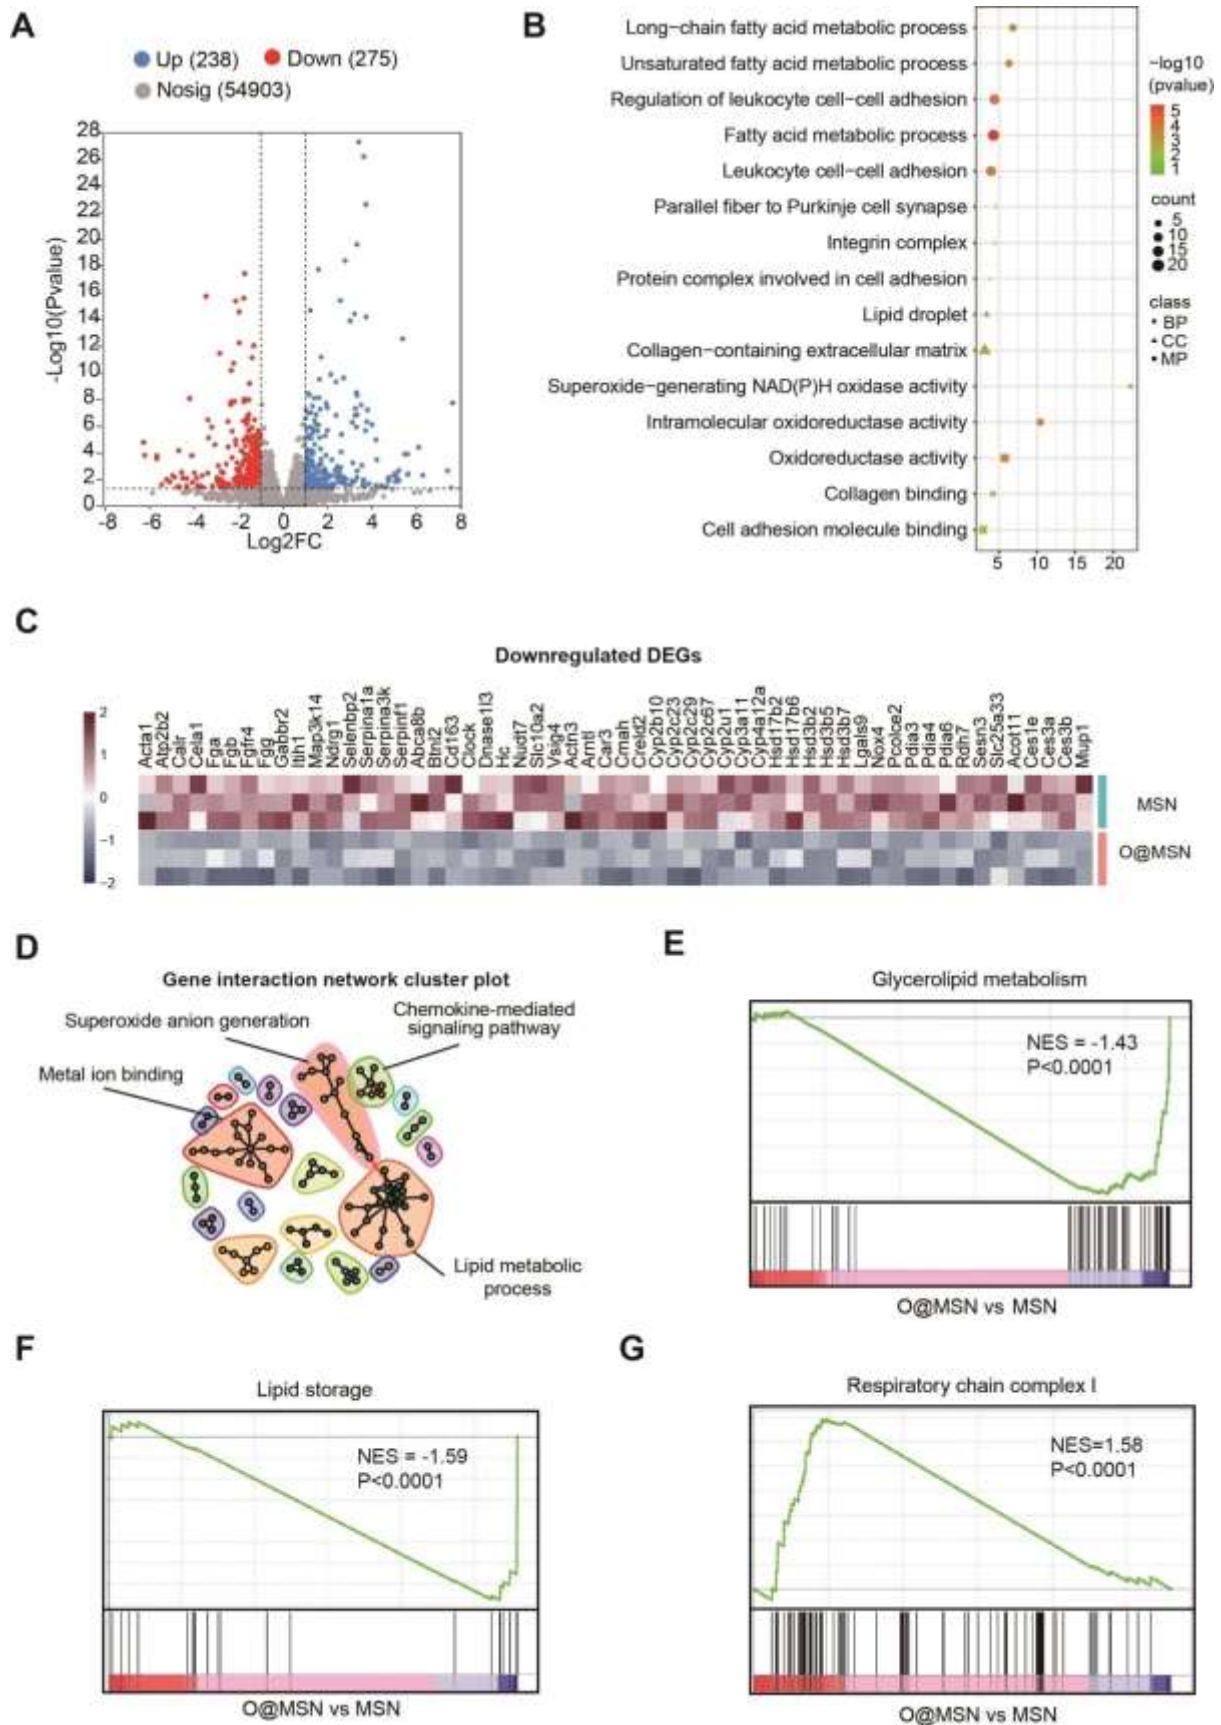

Bulk-tissue RNA sequencing shows the effects of O@MSN on transcriptome in liver tissue of NASH mice.

(A) Volcano plot showing the upregulated DEGs ( $n = 163$ ) and downregulated DEGs ( $n = 199$ ) in liver tissue of mice by treatment of O@MSN compared with MSN.

(B) KEGG plot showing the mainly processes altered by O@MSN compared with MSN in molecular function (MF), biological process (BP) and cell component (CC).

(C) Heatmap plot showing the Top DEGs modulated by O@MSN.

(D) Gene interaction network cluster plot showing the major important modules interacting with other genes altered by treatment of O@MSN compared with MSN.

(E-G) Gene Set Enrichment Analysis (GSEA) plot showing several enriched signaling pathways by treatment of O@MSN compared with MSN.



**Figure S7**

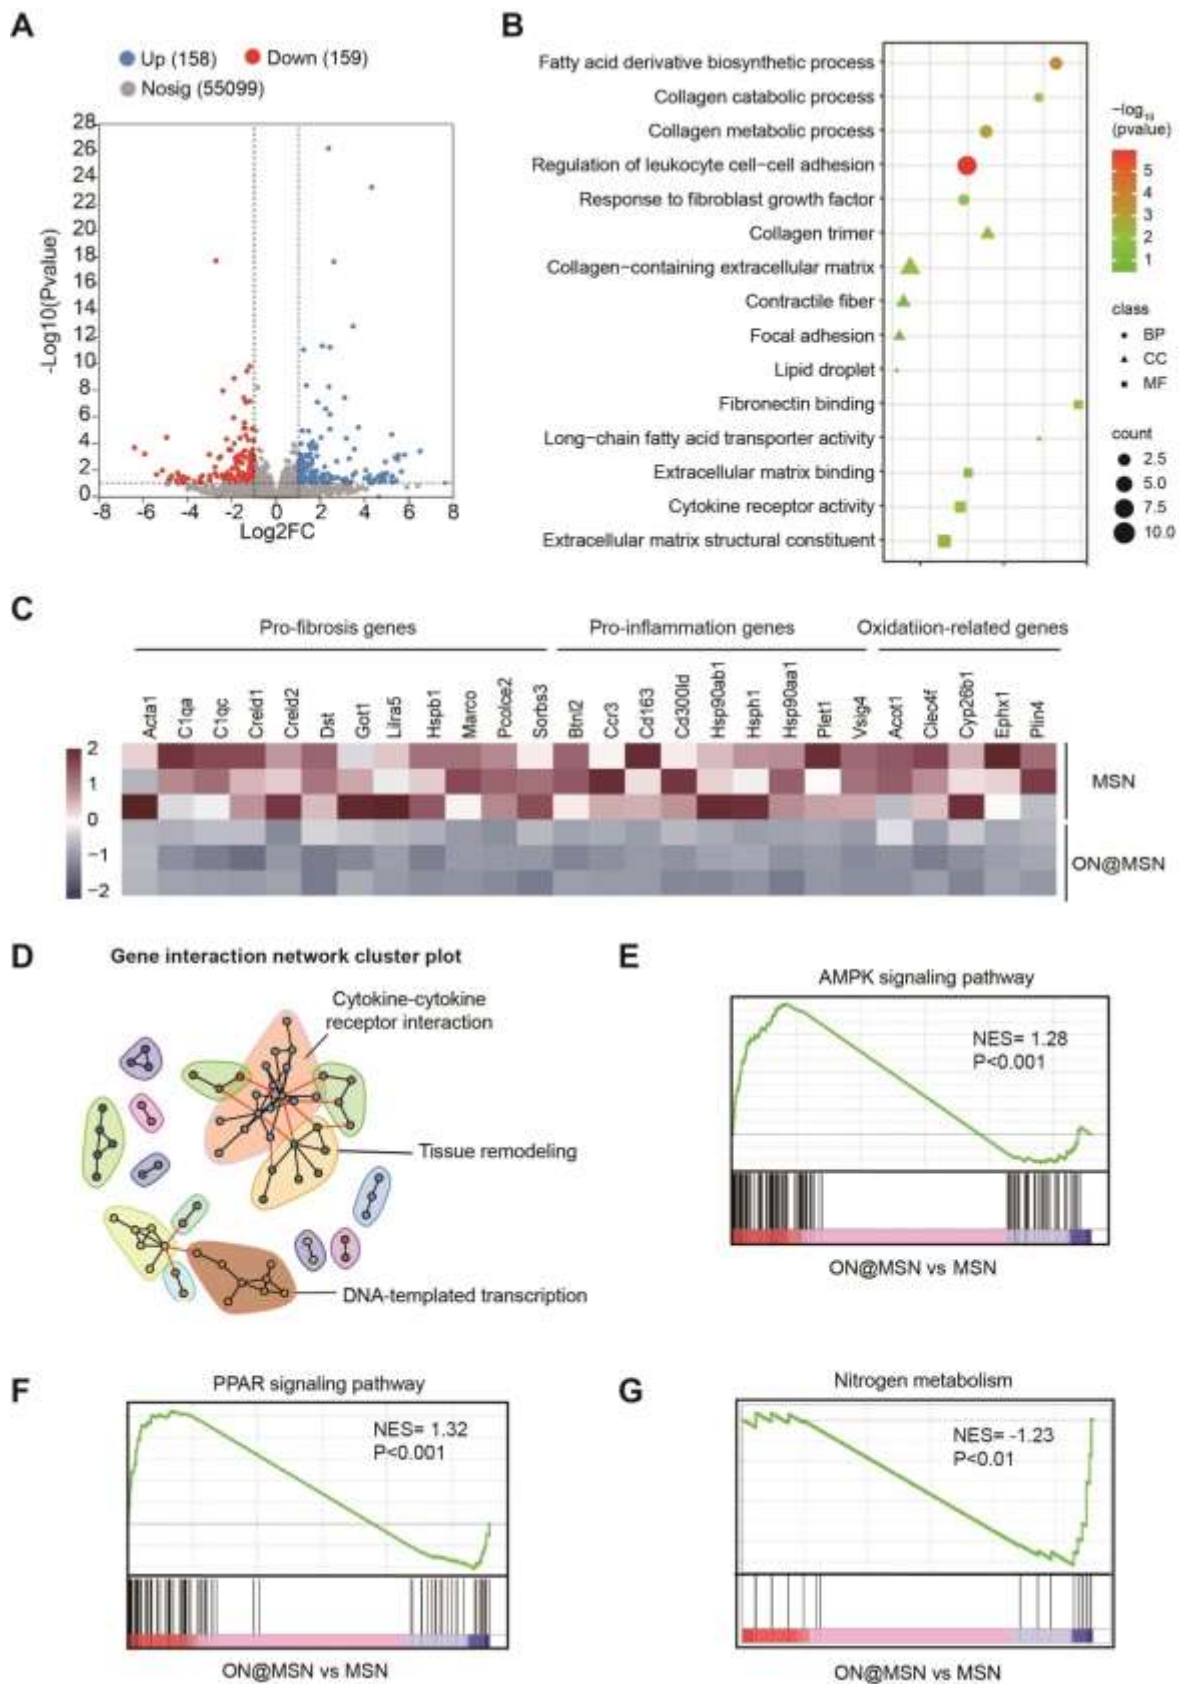

Bulk-tissue RNA sequencing shows the effects of ONL@MSN on transcriptome in liver tissue of NASH mice.

- (A) The experimental design of bulk-tissue RNA sequencing on liver tissues of mice receiving treatment of ONL@MSN or MSN (control).
- (B) Correlation between the samples from two groups.
- (C) Volcano plot showing the upregulated DEGs ( $n = 163$ ) and downregulated DEGs ( $n = 199$ ) in liver tissue of mice receiving treatment of ONL@MSN compared with that of mice receiving treatment of MSN.

**Figure S8**

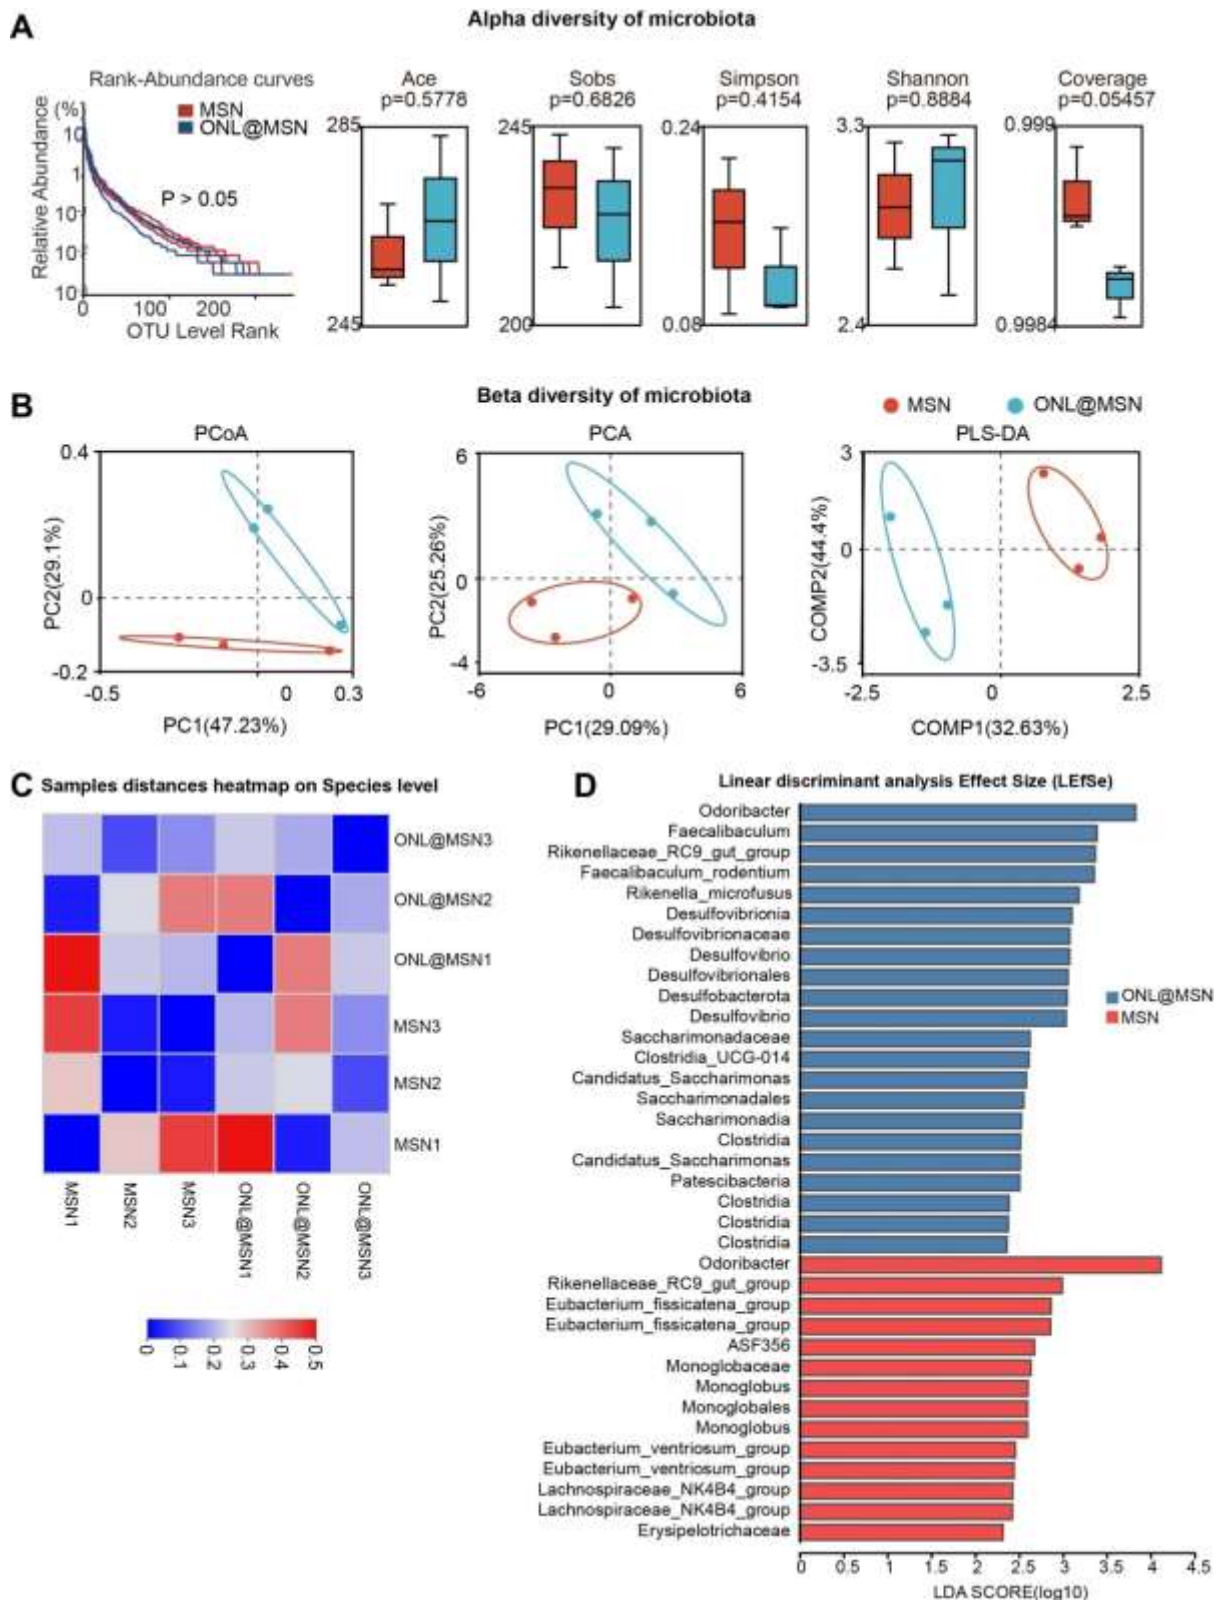

Fecal 16S-rRNA sequencing shows the effects of ONL@MSN on gut microbiota community in NASH mice.

(A) The Alpha diversity of gut microbiota in feces of mice receiving treatment of ONL@MSN or MSN (control).

(B) The Beta diversity of gut microbiota in feces of mice receiving treatment of ONL@MSN or MSN (control).

(C) Correlation between the gut microbiota community in samples from two groups.

(D) LEfSe of gut microbiota community in samples from two group.

**Table S1** Drug loading efficiency of nanoparticles.

| Nanoparticle            | Drug loading efficiency (%) | Entrapment efficiency (%) |
|-------------------------|-----------------------------|---------------------------|
| O@MSN (OCA)             | 67.70 ± 0.22                | 66.03±0.21                |
| ON@MSN (OCA)            | 61.55 ± 0.12                | 59.75±0.12                |
| ONL@MSN (OCA)           | 54.21 ± 0.06                | 53.03±0.06                |
| ONL@MSN (Liproxsatin-1) | 50.17 ± 0.12                | 49.91±0.12                |

Data are expressed as mean ± SD ( $n = 3$ ).

**Table S2** Primers for real-time PCR.

| Gene         | Forward               | Reverse                  |
|--------------|-----------------------|--------------------------|
| <i>Cxcl1</i> | CACCCAAACCGAAGTCATAGC | GGGGACACCTTTTAGCATCTTT   |
| <i>Ccl2</i>  | TGAGGTGGTTGTGGAAAAGG  | CCGTAGCGTTGGGTTTCT       |
| <i>Ccl5</i>  | ACTCCCTGCTGCTTTGCC    | CTGGTGTAGAAATACTCCTTGACG |
| <i>Tnf-α</i> | TTCTCATTCCCTGCTTGTGG  | CACTTGGTGGTTTGCTACG      |
| <i>Il-1β</i> | CAGGCTCCGAGATGAAC     | TGCTTGTGAGGTGCTGA        |
| <i>Il-6</i>  | TGGGACTGATGCTGGTG     | CTGGCTTTGTCTTTCTTGTTA    |
| <i>Gapdh</i> | CCCATCACCATCTTCCAG    | ATGGGGAAGGTGAAGGTCG      |
